# Supplementary material for: Safety of Lumbar Interbody Fusion Procedures for Degenerative Disc Disease: A Systematic Review With Network Meta-Analysis of Prospective Studies
Source: PubMed Central journal article supplement — Global Spine J. 2020 Jul 28;11(5):751–60. doi: 10.1177/2192568220938024 (PMC8165923; doi:10.1177/2192568220938024), 2020-07-28
Supplement: Appendix.pdf [file Appendix.pdf]

---

# **Safety of lumbar interbody fusion procedures for degenerative disc disease:**

**a network meta-analysis of prospective study**

**(Appendix)**

---

# Appendix

**Appendix 1.** Database and search strategy

**Appendix 2.** Risk of bias assessment

**Appendix 3.** Pairwise meta-analysis of overall adverse event

**Appendix 4.** Cumulative rank probability and SUCRA of overall adverse event

**Appendix 5.** Inconsistency test of overall adverse event

**Appendix 6.** Publication bias in network meta-analysis of overall adverse event

**Appendix 7.** Cumulative rank probability and SUCRA of neural event

**Appendix 8.** Inconsistency test of neural event

**Appendix 9.** Publication bias in network meta-analysis of neural event

**Appendix 10.** Cumulative rank probability and SUCRA of spinal event

**Appendix 11.** Inconsistency test of spinal event

**Appendix 12.** Publication bias in network meta-analysis of spinal event

**Appendix 13.** Cumulative rank probability and SUCRA of vascular event

**Appendix 14.** Inconsistency test of vascular event

**Appendix 15.** Publication bias in network meta-analysis of vascular event

**Appendix 16.** Cumulative rank probability and SUCRA of wound event

**Appendix 17.** Inconsistency test of wound event

**Appendix 18.** Publication bias in network meta-analysis of wound event

**Appendix 1**  
**Database and Search Strategy**

# Appendix 1

## Database and search strategy

### EMBASE:

('degenerative spinal disease' OR 'degenerative spine disease'/exp OR 'degenerative spine disease'  
OR 'degenerative disc disease'/exp OR 'degenerative disc disease' OR 'degenerative disc disorder'  
OR 'degenerative spine disorder' OR 'degenerative spine disorders' OR 'degenerative spinal  
disorder' OR 'degenerative spinal disorders' OR 'degenerative disc disorders' OR 'degenerative  
lumbar') AND (('posterior lumbar interbody fusion'/exp OR 'posterior lumbar interbody fusion' OR  
plif) AND ('transforaminal lumbar interbody fusion'/exp OR 'transforaminal lumbar interbody  
fusion' OR tlif) OR (('posterior lumbar interbody fusion'/exp OR 'posterior lumbar interbody fusion'  
OR plif) AND ('anterior lumbar interbody fusion'/exp OR 'anterior lumbar interbody fusion' OR  
alif)) OR (('transforaminal lumbar interbody fusion'/exp OR 'transforaminal lumbar interbody  
fusion' OR tlif) AND ('anterior lumbar interbody fusion'/exp OR 'anterior lumbar interbody fusion'  
OR alif)))

### PubMed (including MEDLINE):

(((((degenerative spinal disease) OR degenerative spine disease) OR degenerative disc disease)  
OR degenerative spine disorder) OR degenerative spine disorders) OR degenerative spinal disorder)  
OR degenerative spinal disorders) OR degenerative disc disorders OR degenerative lumbar)) AND  
((((posterior lumbar interbody fusion) OR PLIF)) AND ((Transforaminal lumbar interbody  
fusion) OR TLIF))) OR (((posterior lumbar interbody fusion) OR PLIF)) AND ((anterior lumbar  
interbody fusion) OR ALIF))) OR (((Transforaminal lumbar interbody fusion) OR TLIF)) AND  
((anterior lumbar interbody fusion) OR ALIF)))

### Ovid Medline:

#### # ▲ Searches

- 1 degenerative spinal disease. af
- 2 degenerative spine disease. af
- 3 degenerative disc disease. af
- 4 degenerative disc disorder. af
- 5 degenerative spine disorder. af
- 6 degenerative spine disorders. af
- 7 degenerative spinal disorder. af
- 8 degenerative spinal disorders. af
- 9 degenerative disc disorders. af
- 10 degenerative lumbar. af
- 11 1 or 2 or 3 or 4 or 5 or 6 or 7 or 8 or 9 or 11
- 12 posterior lumbar interbody fusion. af
- 13 PLIF. af
- 14 12 or 13
- 15 Transforaminal lumbar interbody fusion. af
- 16 TLIF. af
- 17 15 or 16
- 18 anterior lumbar interbody fusion. af
- 19 ALIF. af
- 20 18 or 19
- 21 14 and 17
- 22 14 and 20
- 23 17 and 20
- 24 21 or 22 or 23
- 25 11 and 24

# Appendix 1

## Database and search strategy

Web of Science InCites Journal Citation Reports Essential Science Indicators EndNote Publons Kopernio

YI-No Help English

Web of Science

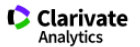

Search

Tools Searches and alerts Search History Marked List

Search History

| Set | Results |                                                                                                                                                                                                                                                                                                                                               | Save History / Create Alert | Open Saved History | Edit Sets | Combine Sets<br><input type="radio"/> AND <input type="radio"/> OR<br>Combine | Delete Sets<br>Select All<br>Delete |
|-----|---------|-----------------------------------------------------------------------------------------------------------------------------------------------------------------------------------------------------------------------------------------------------------------------------------------------------------------------------------------------|-----------------------------|--------------------|-----------|-------------------------------------------------------------------------------|-------------------------------------|
| # 9 | 533     | #8 AND #1<br><i>Indexes=SCI-EXPANDED, SSCI Timespan=All years</i>                                                                                                                                                                                                                                                                             |                             |                    | Edit      | <input type="checkbox"/>                                                      | <input type="checkbox"/>            |
| # 8 | 1,525   | #7 OR #6 OR #5<br><i>Indexes=SCI-EXPANDED, SSCI Timespan=All years</i>                                                                                                                                                                                                                                                                        |                             |                    | Edit      | <input type="checkbox"/>                                                      | <input type="checkbox"/>            |
| # 7 | 320     | #4 AND #3<br><i>Indexes=SCI-EXPANDED, SSCI Timespan=All years</i>                                                                                                                                                                                                                                                                             |                             |                    | Edit      | <input type="checkbox"/>                                                      | <input type="checkbox"/>            |
| # 6 | 1,142   | #4 AND #2<br><i>Indexes=SCI-EXPANDED, SSCI Timespan=All years</i>                                                                                                                                                                                                                                                                             |                             |                    | Edit      | <input type="checkbox"/>                                                      | <input type="checkbox"/>            |
| # 5 | 547     | #3 AND #2<br><i>Indexes=SCI-EXPANDED, SSCI Timespan=All years</i>                                                                                                                                                                                                                                                                             |                             |                    | Edit      | <input type="checkbox"/>                                                      | <input type="checkbox"/>            |
| # 4 | 2,139   | TOPIC: (anterior lumbar interbody fusion OR ALIF)<br><i>Indexes=SCI-EXPANDED, SSCI Timespan=All years</i>                                                                                                                                                                                                                                     |                             |                    | Edit      | <input type="checkbox"/>                                                      | <input type="checkbox"/>            |
| # 3 | 1,126   | TOPIC: (Transforaminal lumbar interbody fusion OR TLIF)<br><i>Indexes=SCI-EXPANDED, SSCI Timespan=All years</i>                                                                                                                                                                                                                               |                             |                    | Edit      | <input type="checkbox"/>                                                      | <input type="checkbox"/>            |
| # 2 | 3,848   | TOPIC: (posterior lumbar interbody fusion OR PLIF)<br><i>Indexes=SCI-EXPANDED, SSCI Timespan=All years</i>                                                                                                                                                                                                                                    |                             |                    | Edit      | <input type="checkbox"/>                                                      | <input type="checkbox"/>            |
| # 1 | 10,487  | TOPIC: (degenerative spinal disease OR degenerative spine disease OR degenerative disc disease OR degenerative spine disorder OR degenerative spine disorders OR degenerative spinal disorder OR degenerative spinal disorders OR degenerative disc disorders OR degenerative lumbar)<br><i>Indexes=SCI-EXPANDED, SSCI Timespan=All years</i> |                             |                    | Edit      | <input type="checkbox"/>                                                      | <input type="checkbox"/>            |
|     |         |                                                                                                                                                                                                                                                                                                                                               |                             |                    |           | <input type="radio"/> AND <input type="radio"/> OR                            | Select All                          |

**Appendix 2**  
**Risk of Bias Assessment**

# Appendix 2

## Risk of bias assessment (randomized clinical trials)

|                             | Random sequence generation (selection bias) | Allocation concealment (selection bias) | Blinding of participants and personnel (performance bias) | Blinding of outcome assessment (detection bias) | Incomplete outcome data (attrition bias) | Selective reporting (reporting bias) | Other bias |
|-----------------------------|---------------------------------------------|-----------------------------------------|-----------------------------------------------------------|-------------------------------------------------|------------------------------------------|--------------------------------------|------------|
| Hoff et al., 2016           | ?                                           | ?                                       | -                                                         | -                                               | +                                        | +                                    | +          |
| Kim et al. 2018             | +                                           | +                                       | -                                                         | -                                               | +                                        | +                                    | -          |
| Lin et al., 2012            | +                                           | ?                                       | -                                                         | -                                               | +                                        | +                                    | ?          |
| Putzier et al. 2016         | +                                           | +                                       | -                                                         | -                                               | +                                        | +                                    | +          |
| Rodríguez-Vela et al., 2013 | ?                                           | ?                                       | -                                                         | -                                               | +                                        | +                                    | +          |
| Xue et al. 2013             | +                                           | -                                       | -                                                         | -                                               | +                                        | +                                    | +          |

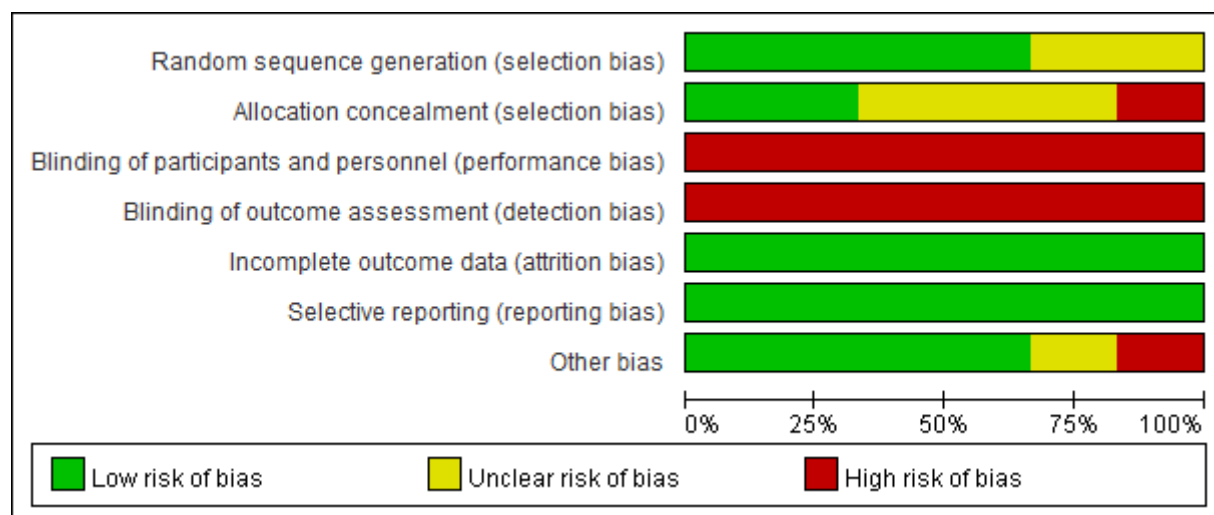

## Appendix 2

### Risk of bias assessment (ROBINS-I )

| Study                                              | Chen 2017 | Lee 2017 | Kulkarni 2016 | Parker 2014 | Fen 2010 | Crandall 2009 | Klara 2003 |
|----------------------------------------------------|-----------|----------|---------------|-------------|----------|---------------|------------|
| Bias due to confounding                            | Low       | Moderate | Moderate      | Low         | Low      | Moderate      | Low        |
| Bias in selection of participants into the study   | Low       | Low      | Low           | Low         | Low      | Moderate      | Low        |
| Bias in classification of interventions            | Low       | Low      | Low           | Low         | Low      | Low           | Low        |
| Bias due to deviations from intended interventions | Low       | Low      | Low           | Low         | Low      | Low           | Low        |
| Bias due to missing data                           | Low       | Low      | Moderate      | Low         | Moderate | Low           | Low        |
| Bias in measurements of outcomes                   | Low       | Low      | Low           | Low         | Low      | Low           | Low        |
| Bias in selection of reported results              | Low       | Low      | Low           | Low         | Low      | Moderate      | Low        |
| <b>Overall</b>                                     | Low       | Moderate | Moderate      | Low         | Moderate | Moderate      | Low        |



**Appendix 3 to 6**  
**Outcome of Overall Adverse Event**

# Appendix 3

## Pairwise meta-analysis of overall adverse event

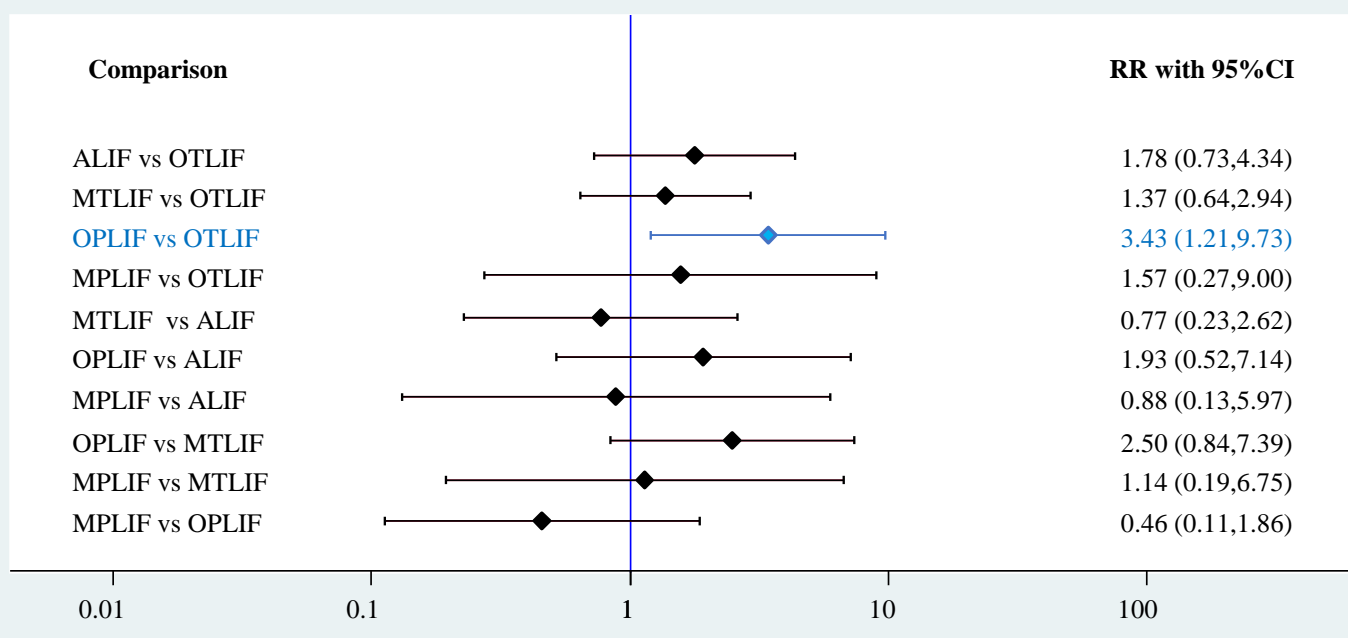

# Appendix 4

## Cumulative rank probability and SUCRA of overall adverse event

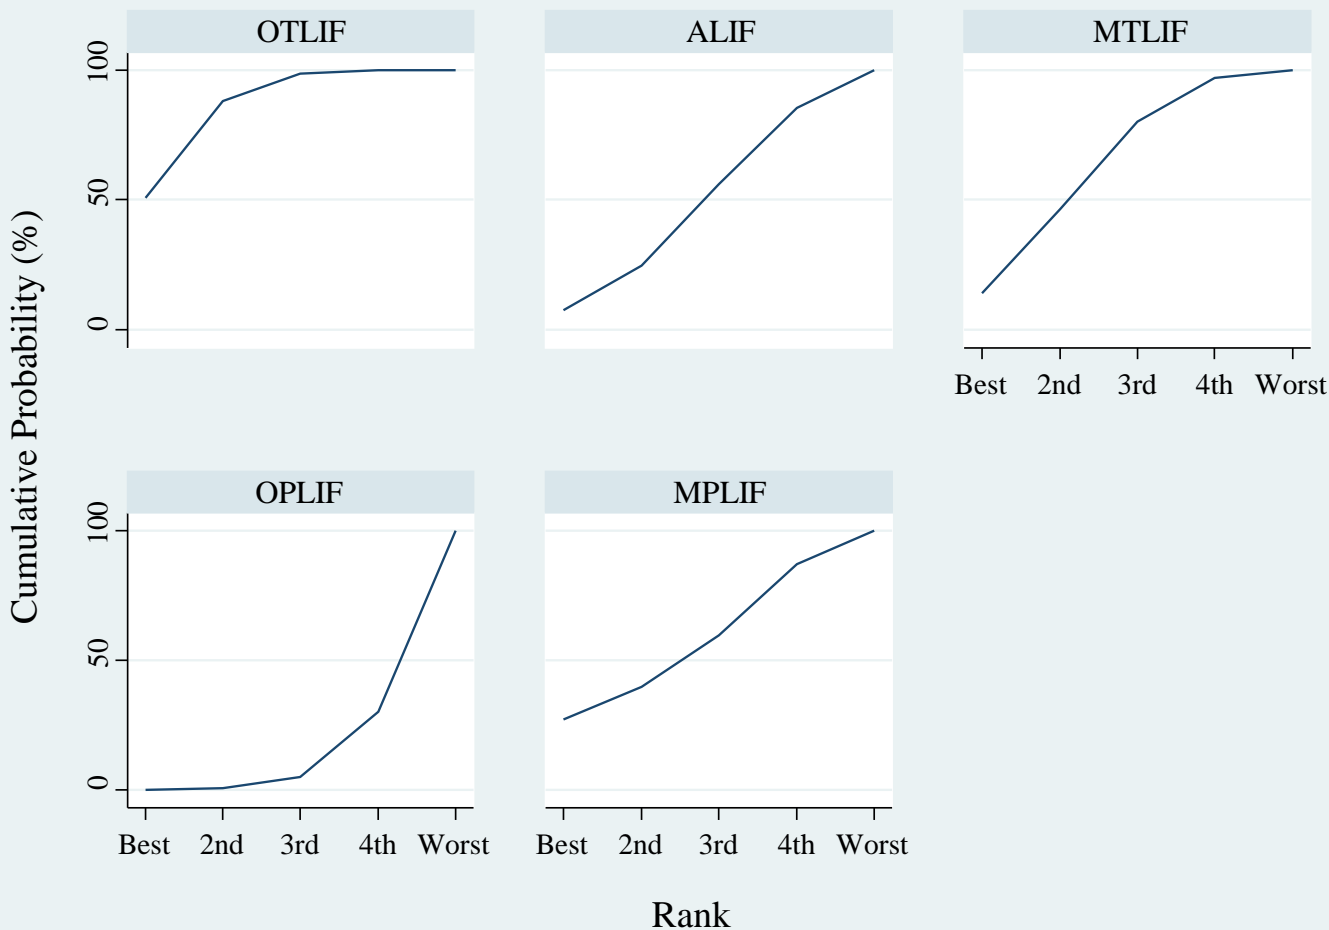

. sucra prob\*, labels(“OTLIF” “ALIF” “MTLIF” “OPLIF” “MPLIF”)

| Treatment | SUCRA | PrBest | MeanRank |
|-----------|-------|--------|----------|
| OTLIF     | 84.4  | 50.8   | 1.6      |
| ALIF      | 43.5  | 7.5    | 3.3      |
| MTLIF     | 59.5  | 14.3   | 2.6      |
| OPLIF     | 9.1   | 0.1    | 4.6      |
| MPLIF     | 53.4  | 27.3   | 2.9      |

# Appendix 5

## Inconsistency test of overall adverse event

```
. network meta i, luades
Command is: mvmeta _y _S , bscovariance(exch 0.5) longparm suppress(uv mm)
eq(_y_D: groupB groupC) vars(_y_B _y_C _y_D _y_E)
```

Multivariate meta-analysis

Variance-covariance matrix = proportional .5\*I(4)+.5\*J(4,4,1)

Method = reml                                Number of dimensions = 4

Restricted log likelihood = -37.714535      Number of observations = 12

|        | Coef.     | Std. Err. | z     | P> z  | [95% Conf. Interval] |          |
|--------|-----------|-----------|-------|-------|----------------------|----------|
| -----  |           |           |       |       |                      |          |
| _y_B   |           |           |       |       |                      |          |
| _cons  | .6684841  | .4011767  | 1.67  | 0.096 | -.1178078            | 1.454776 |
| -----  |           |           |       |       |                      |          |
| _y_C   |           |           |       |       |                      |          |
| _cons  | .1363817  | .3986513  | 0.34  | 0.732 | -.6449605            | .9177239 |
| -----  |           |           |       |       |                      |          |
| _y_D   |           |           |       |       |                      |          |
| groupB | .7516184  | 1.664417  | 0.45  | 0.652 | -2.51058             | 4.013817 |
| groupC | -1.140805 | 1.132547  | -1.01 | 0.314 | -3.360557            | 1.078947 |
| _cons  | 1.576334  | .7502161  | 2.10  | 0.036 | .1059374             | 3.046731 |
| -----  |           |           |       |       |                      |          |
| _y_E   |           |           |       |       |                      |          |
| _cons  | .7975606  | 1.030094  | 0.77  | 0.439 | -1.221387            | 2.816508 |
| -----  |           |           |       |       |                      |          |

Estimated between-studies SDs and correlation matrix:

|      | SD        | _y_B | _y_C | _y_D | _y_E |
|------|-----------|------|------|------|------|
| _y_B | 9.577e-07 | 1    | .    | .    | .    |
| _y_C | 9.577e-07 | .5   | 1    | .    | .    |
| _y_D | 9.577e-07 | .5   | .5   | 1    | .    |
| _y_E | 9.577e-07 | .5   | .5   | .5   | 1    |

Testing for inconsistency:

(1) [\_y\_D]groupB = 0

(2) [\_y\_D]groupC = 0

chi2( 2) = 1.64

Prob > chi2 = 0.4413

# Appendix 6

## Publication bias in network meta-analysis of overall adverse event

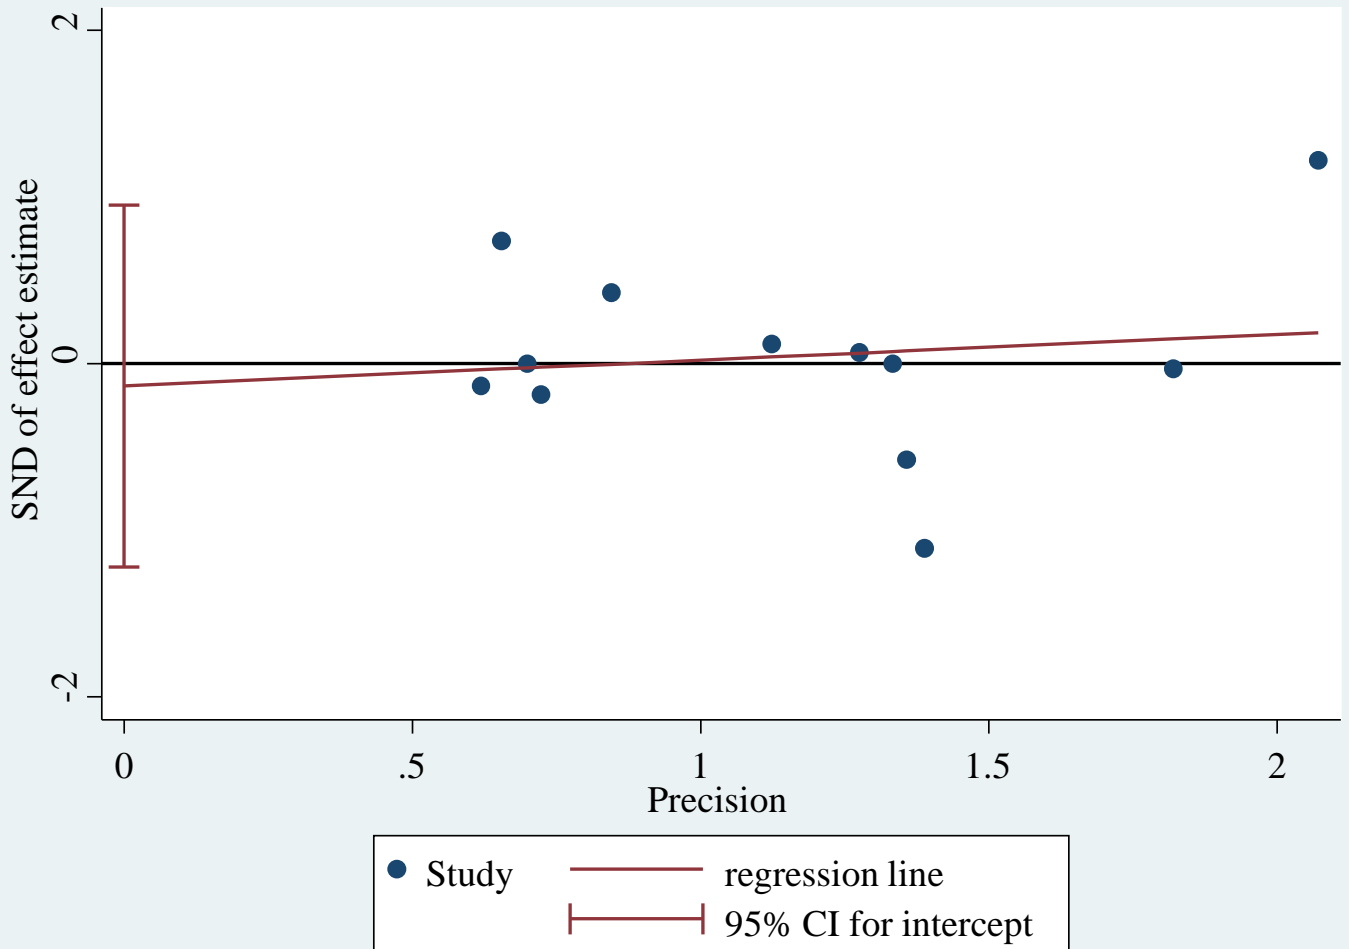

. metabias \_ES\_CEN seES , egger graph

Number of studies = 5

Root MSE = .1784

| Std_Eff | Coef.     | Std. Err. | t     | P> t  | [95% Conf. Interval] |          |
|---------|-----------|-----------|-------|-------|----------------------|----------|
| slope   | .1537296  | .3915531  | 0.39  | 0.703 | -.718705             | 1.026164 |
| bias    | -.1336616 | .4869563  | -0.27 | 0.789 | -1.218668            | .9513445 |

Test of H0: no small-study effects

P = 0.789

**Appendix 7 to 9**  
**Outcomes of Neural Event**

# Appendix 7

## Cumulative rank probability and SUCRA of neural event

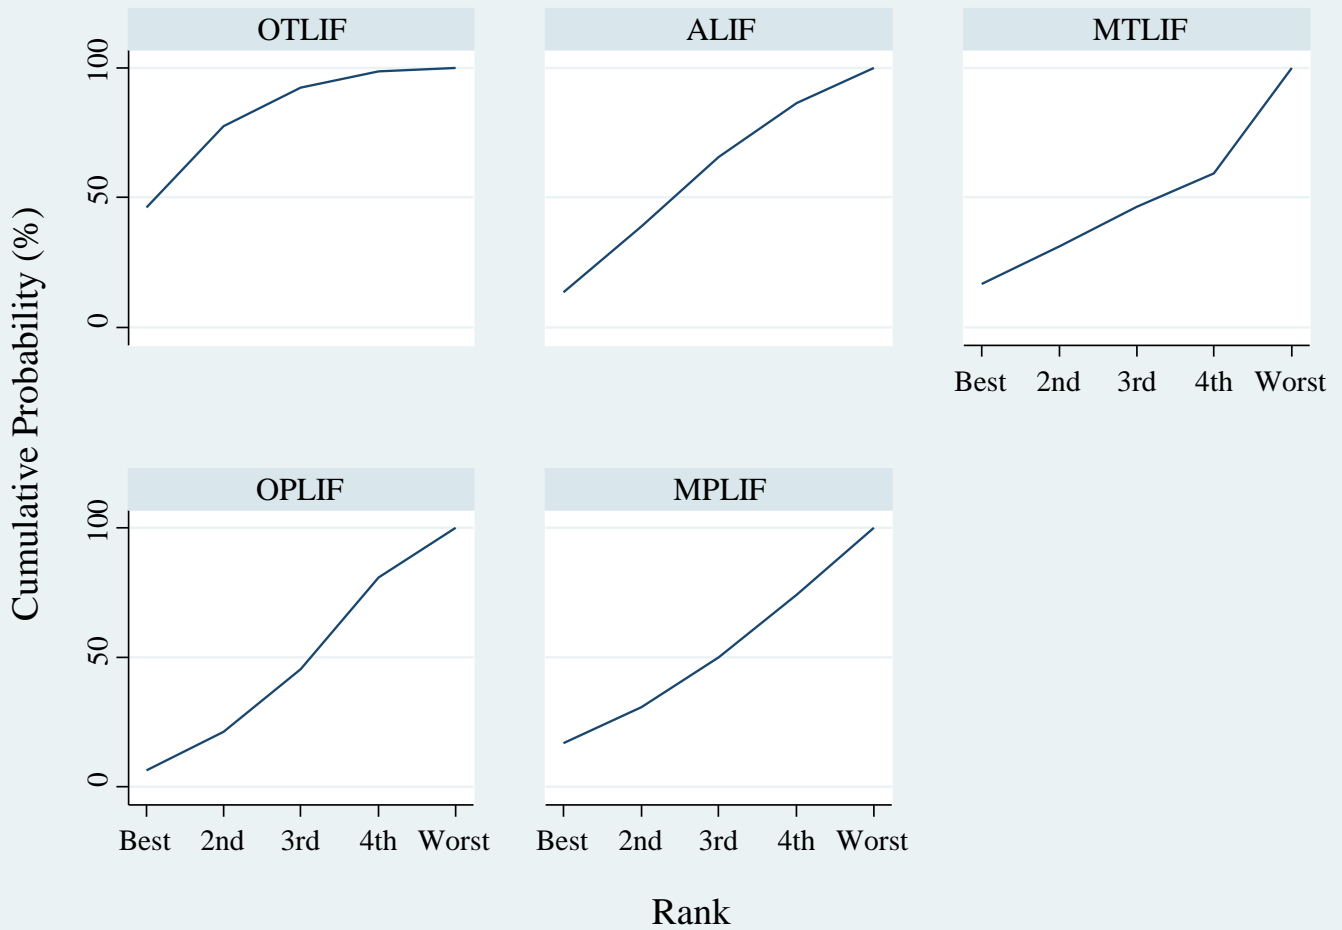

. sucra prob\*, labels(“OTLIF” “ALIF” “MTLIF” “OPLIF” “MPLIF”)

| Treatment | SUCRA | PrBest | MeanRank |
|-----------|-------|--------|----------|
| OTLIF     | 78.7  | 46.3   | 1.9      |
| ALIF      | 51.2  | 13.5   | 3.0      |
| MTLIF     | 38.6  | 16.8   | 3.5      |
| OPLIF     | 38.4  | 6.3    | 3.5      |
| MPLIF     | 43.1  | 17.1   | 3.3      |

# Appendix 8

## Inconsistency test of neural event

. network meta i, luades

Command is: mvmeta \_y \_S , bscovariance(exch 0.5) longparm suppress(uv mm)  
 eq(\_y\_D: groupB groupC) vars(\_y\_B \_y\_C \_y\_D \_y\_E)

Multivariate meta-analysis

Variance-covariance matrix = proportional .5\*I(4)+.5\*J(4,4,1)

Method = reml Number of dimensions = 4

Restricted log likelihood = -21.651553 Number of observations = 7

|        | Coef.    | Std. Err. | Z     | P> z  | [95% Conf. Interval] |          |
|--------|----------|-----------|-------|-------|----------------------|----------|
| -----  |          |           |       |       |                      |          |
| _y_B   |          |           |       |       |                      |          |
| _cons  | .7215717 | 1.023726  | 0.70  | 0.481 | -1.284893            | 2.728037 |
| -----  |          |           |       |       |                      |          |
| _y_C   |          |           |       |       |                      |          |
| _cons  | 1.256617 | 1.527911  | 0.82  | 0.411 | -1.738034            | 4.251267 |
| -----  |          |           |       |       |                      |          |
| _y_D   |          |           |       |       |                      |          |
| groupB | -.086557 | 2.489752  | -0.03 | 0.972 | -4.966381            | 4.793267 |
| _cons  | 1.169025 | 1.618348  | 0.72  | 0.470 | -2.002879            | 4.340929 |
| -----  |          |           |       |       |                      |          |
| _y_E   |          |           |       |       |                      |          |
| _cons  | 1.089964 | 1.865302  | 0.58  | 0.559 | -2.56596             | 4.745888 |
| -----  |          |           |       |       |                      |          |

Estimated between-studies SDs and correlation matrix:

|      | SD        | _y_B | _y_C | _y_D | _y_E |
|------|-----------|------|------|------|------|
| _y_B | 2.779e-10 | 1    | .    | .    | .    |
| _y_C | 2.779e-10 | .5   | 1    | .    | .    |
| _y_D | 2.779e-10 | .5   | .5   | 1    | .    |
| _y_E | 2.779e-10 | .5   | .5   | .5   | 1    |

Testing for inconsistency:

( 1) [\_y\_D]groupB = 0

chi2( 1) = 0.00

Prob > chi2 = 0.9723



# Appendix 9

## Publication bias in network meta-analysis of neural event

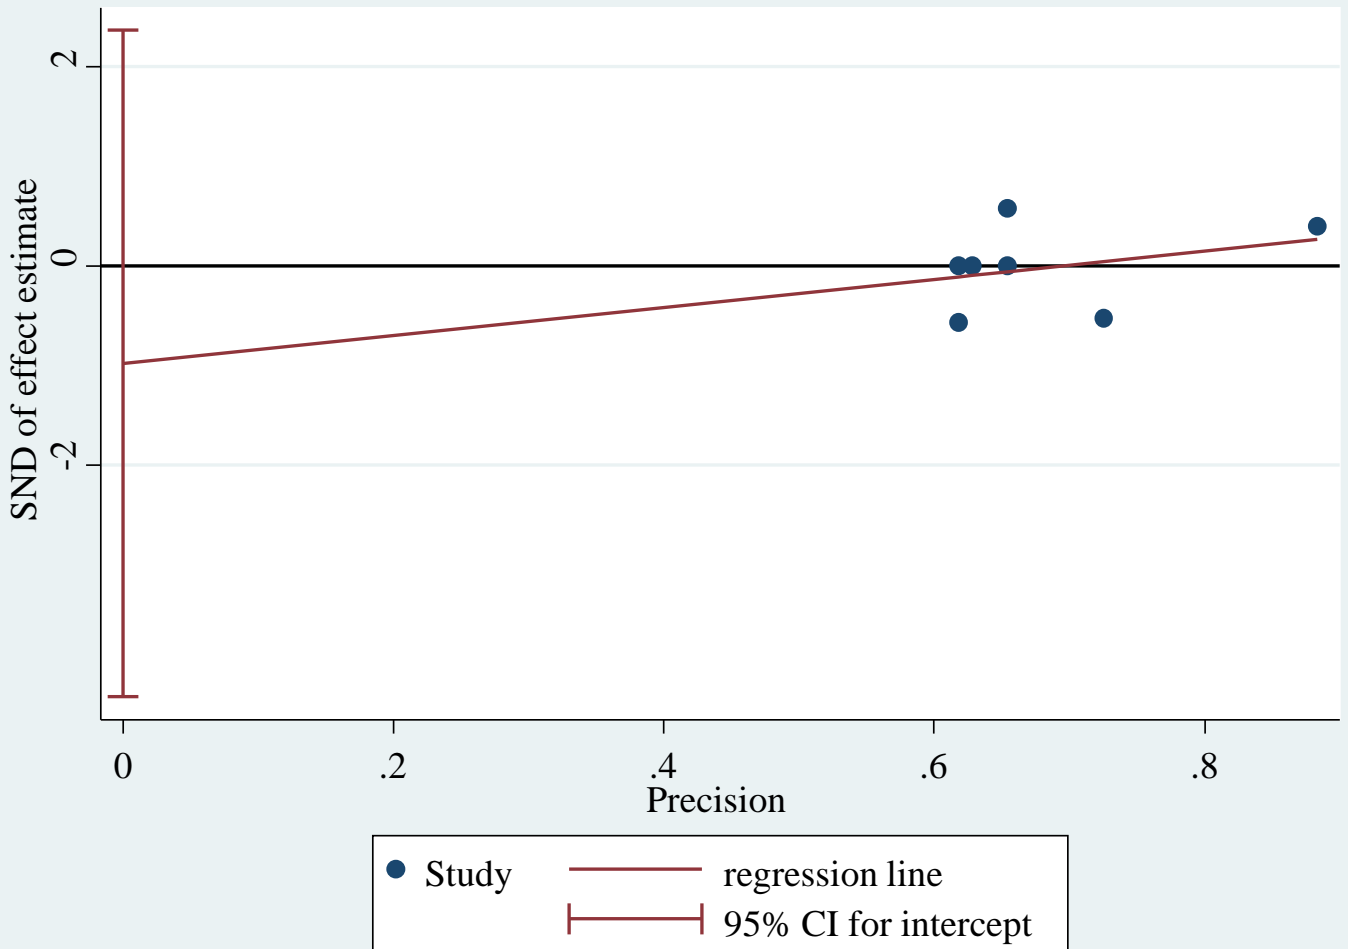

. metabias \_ES\_CEN seES , egger graph

Number of studies = 7

Root MSE = .4431

| Std_Eff | Coef.     | Std. Err. | t     | P> t  | [95% Conf. Interval] |          |
|---------|-----------|-----------|-------|-------|----------------------|----------|
| slope   | 1.40986   | 1.890679  | 0.75  | 0.489 | -3.450285            | 6.270006 |
| bias    | -.9792592 | 1.302321  | -0.75 | 0.486 | -4.326983            | 2.368464 |

Test of H0: no small-study effects

P = 0.486

**Appendix 10 to 12**  
**Outcomes of Spinal Event**

# Appendix 10

## Cumulative rank probability and SUCRA of spinal event

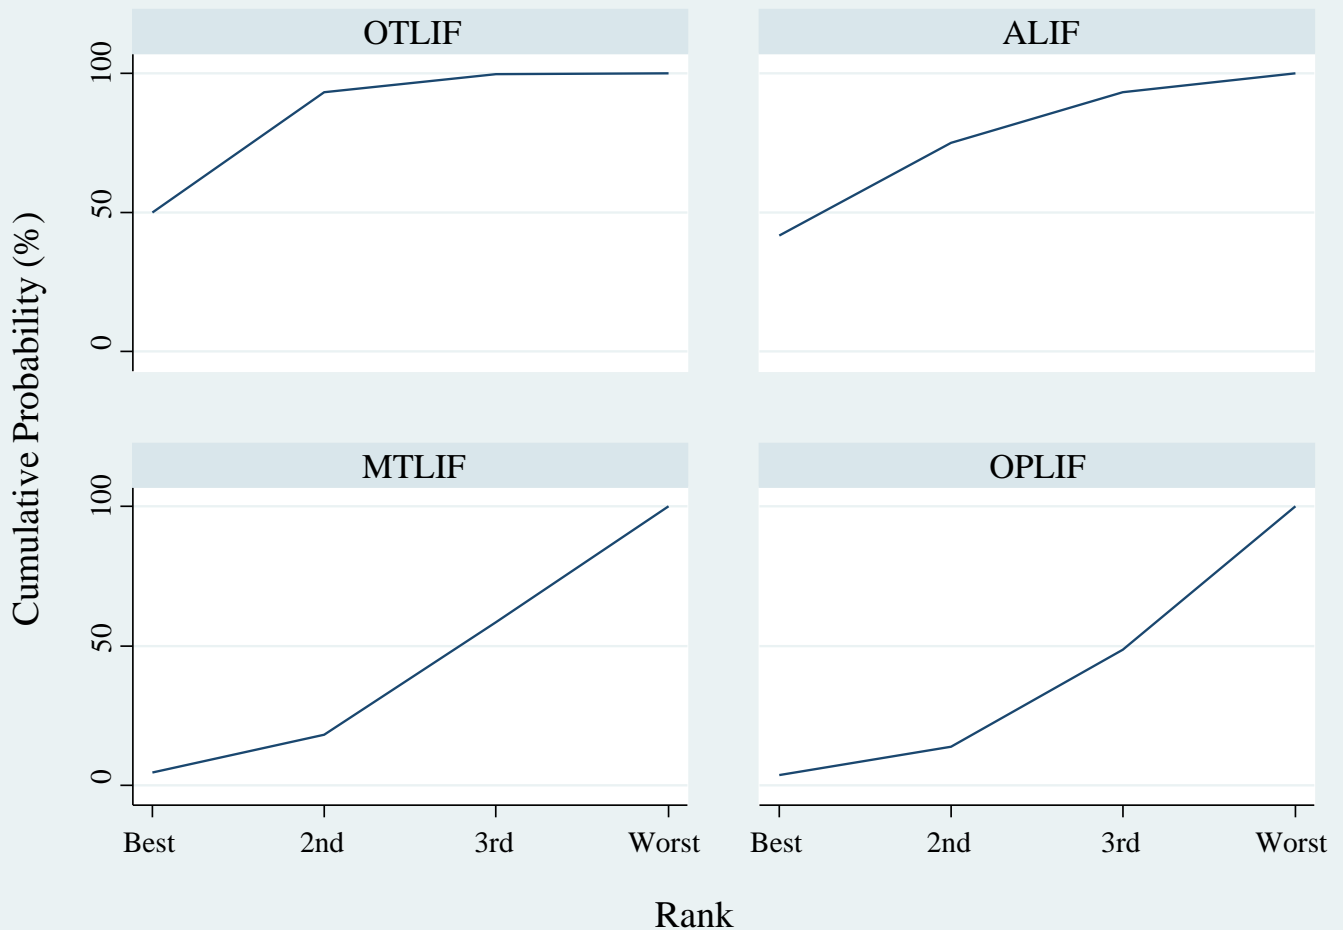

. sucra prob\*, labels(“OTLIF” “ALIF” “MTLIF” “OPLIF”)

| Treatment | SUCRA | PrBest | MeanRank |
|-----------|-------|--------|----------|
| OTLIF     | 80.8  | 49.9   | 1.6      |
| ALIF      | 69.9  | 41.6   | 1.9      |
| MTLIF     | 27.2  | 4.7    | 3.2      |
| OPLIF     | 22.1  | 3.8    | 3.3      |

# Appendix 11

## Inconsistency test of spinal event

```
. network meta i, luades
Command is: mvmeta _y _S , bscovariance(exch 0.5) longparm suppress(uv mm)
eq(_y_D: groupB groupC) vars(_y_B _y_C _y_D)
```

Multivariate meta-analysis

Variance-covariance matrix = proportional .5\*I(3)+.5\*J(3,3,1)

Method = reml                                      Number of dimensions = 3

Restricted log likelihood = -17.025336          Number of observations = 8

|        | Coef.     | Std. Err. | z     | P> z  | [95% Conf. Interval] |          |
|--------|-----------|-----------|-------|-------|----------------------|----------|
| -----  |           |           |       |       |                      |          |
| _y_B   |           |           |       |       |                      |          |
| _cons  | .1920891  | .713122   | 0.27  | 0.788 | -1.205604            | 1.589782 |
| -----  |           |           |       |       |                      |          |
| _y_C   |           |           |       |       |                      |          |
| _cons  | .6797541  | .6453069  | 1.05  | 0.292 | -.5850242            | 1.944532 |
| -----  |           |           |       |       |                      |          |
| _y_D   |           |           |       |       |                      |          |
| groupB | .2291764  | 1.810397  | 0.13  | 0.899 | -3.319136            | 3.777489 |
| groupC | -1.589795 | 1.913704  | -0.83 | 0.406 | -5.340586            | 2.160997 |
| _cons  | 1.170933  | .786391   | 1.49  | 0.136 | -.3703652            | 2.712231 |
| -----  |           |           |       |       |                      |          |

Estimated between-studies SDs and correlation matrix:

|      | SD        | _y_B | _y_C | _y_D |
|------|-----------|------|------|------|
| _y_B | 8.701e-09 | 1    | .    | .    |
| _y_C | 8.701e-09 | .5   | 1    | .    |
| _y_D | 8.701e-09 | .5   | .5   | 1    |

Testing for inconsistency:

(1) [\_y\_D]groupB = 0

(2) [\_y\_D]groupC = 0

chi2( 2) = 0.77

Prob > chi2 = 0.6811

# Appendix 12

## Publication bias in network meta-analysis of spinal event

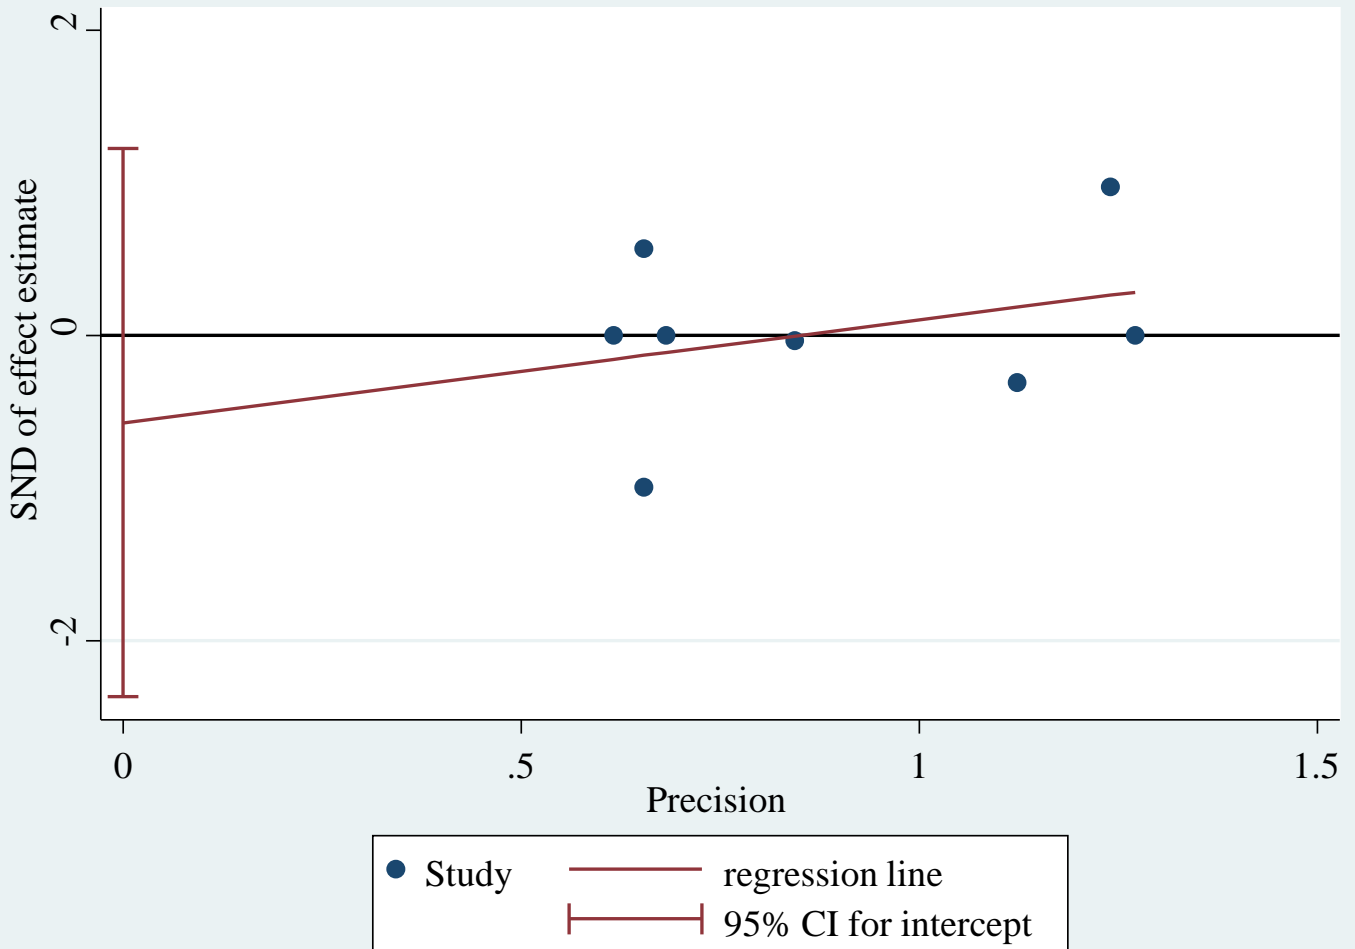

. metabias \_ES\_CEN seES , egger graph

Number of studies = 8

Root MSE = .5909

| Std_Eff | Coef.     | Std. Err. | t     | P> t  | [95% Conf. Interval] |          |
|---------|-----------|-----------|-------|-------|----------------------|----------|
| slope   | .6718966  | .7941071  | 0.85  | 0.430 | -1.271214            | 2.615007 |
| bias    | -.5688645 | .7337513  | -0.78 | 0.468 | -2.364289            | 1.22656  |

Test of H0: no small-study effects

P = 0.486

**Appendix 13 to 15**  
**Outcomes of Vascular Event**

# Appendix 13

## Cumulative rank probability and SUCRA of vascular event

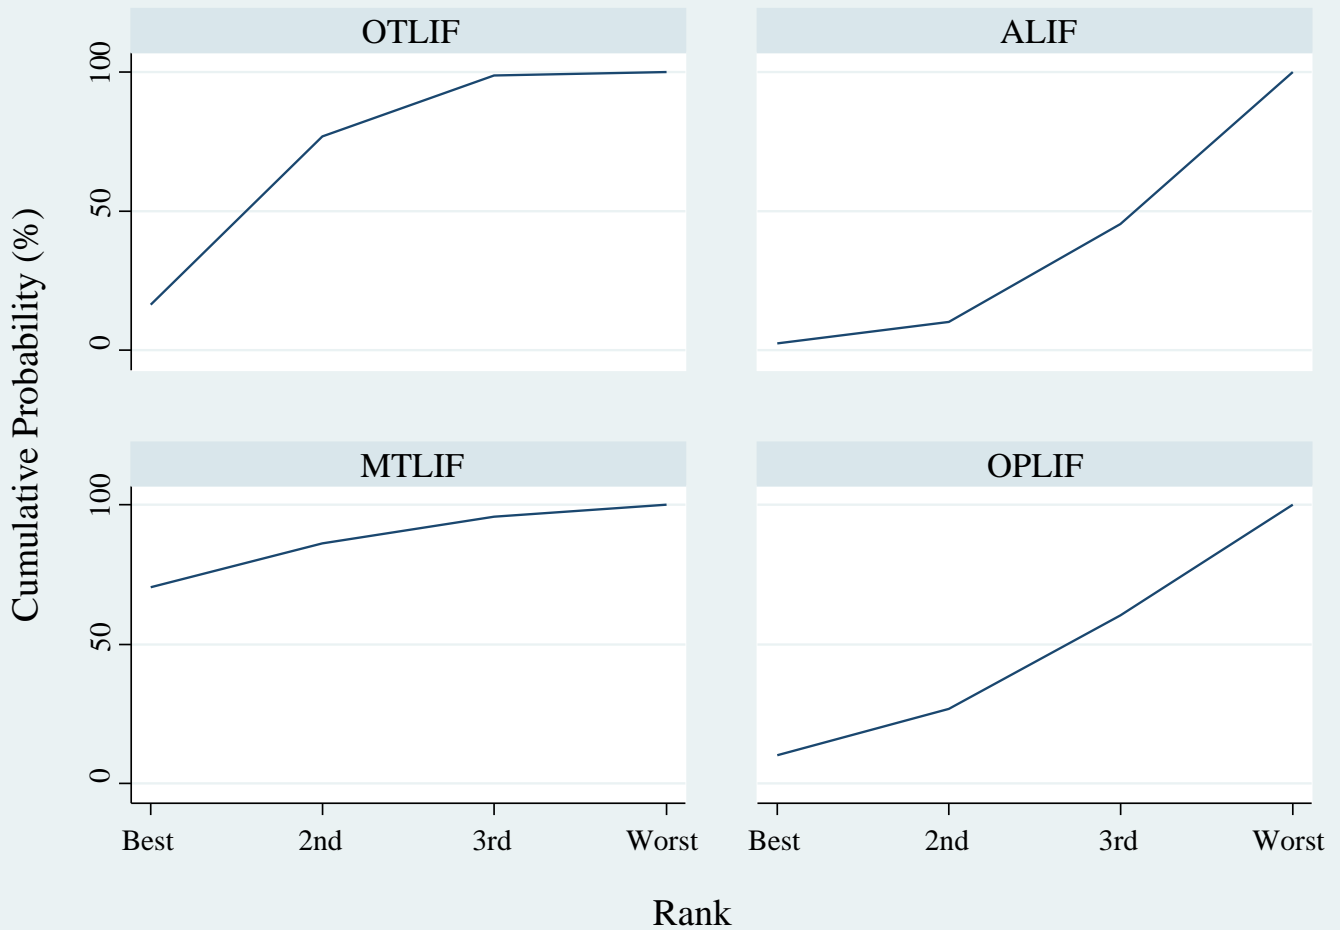

. sucra prob\*, labels(“OTLIF” “ALIF” “MTLIF” “OPLIF”)

| Treatment | SUCRA | PrBest | MeanRank |
|-----------|-------|--------|----------|
| OTLIF     | 64.0  | 16.6   | 2.1      |
| ALIF      | 19.4  | 2.5    | 3.4      |
| MTLIF     | 84.2  | 70.6   | 1.5      |
| OPLIF     | 32.5  | 10.3   | 3.0      |

# Appendix 14

## Inconsistency test of vascular event

. network meta i, luades

Command is: mvmeta \_y \_S , bscovariance(exch 0.5) longparm suppress(uv mm)

eq(\_y\_D: groupB groupC) vars(\_y\_B \_y\_C \_y\_D)

Multivariate meta-analysis

Variance-covariance matrix = proportional .5\*I(3)+.5\*J(3,3,1)

Method = reml                                      Number of dimensions = 3

Restricted log likelihood = -1.7775544      Number of observations = 4

|       | Coef.     | Std. Err. | z     | P> z  | [95% Conf. Interval] |          |
|-------|-----------|-----------|-------|-------|----------------------|----------|
| ----- |           |           |       |       |                      |          |
| _y_B  |           |           |       |       |                      |          |
| _cons | 1.558814  | 1.090751  | 1.43  | 0.153 | -0.5790178           | 3.696647 |
| ----- |           |           |       |       |                      |          |
| _y_C  |           |           |       |       |                      |          |
| _cons | -1.161133 | 1.613724  | -0.72 | 0.472 | -4.323974            | 2.001709 |
| ----- |           |           |       |       |                      |          |
| _y_D  |           |           |       |       |                      |          |
| _cons | 1.16923   | 1.618502  | 0.72  | 0.470 | -2.002976            | 4.341436 |
| ----- |           |           |       |       |                      |          |

Estimated between-studies SDs and correlation matrix:

|      | SD        | _y_B | _y_C | _y_D |
|------|-----------|------|------|------|
| _y_B | 5.093e-13 | 1    | .    | .    |
| _y_C | 5.093e-13 | .5   | 1    | .    |
| _y_D | 5.093e-13 | .5   | .5   | 1    |

Testing for inconsistency:

( 1) [\_y\_D]\_cons = 0

chi2( 1) = 0.52

Prob > chi2 = 0.4700



# Appendix 15

## Publication bias in network meta-analysis of vascular event

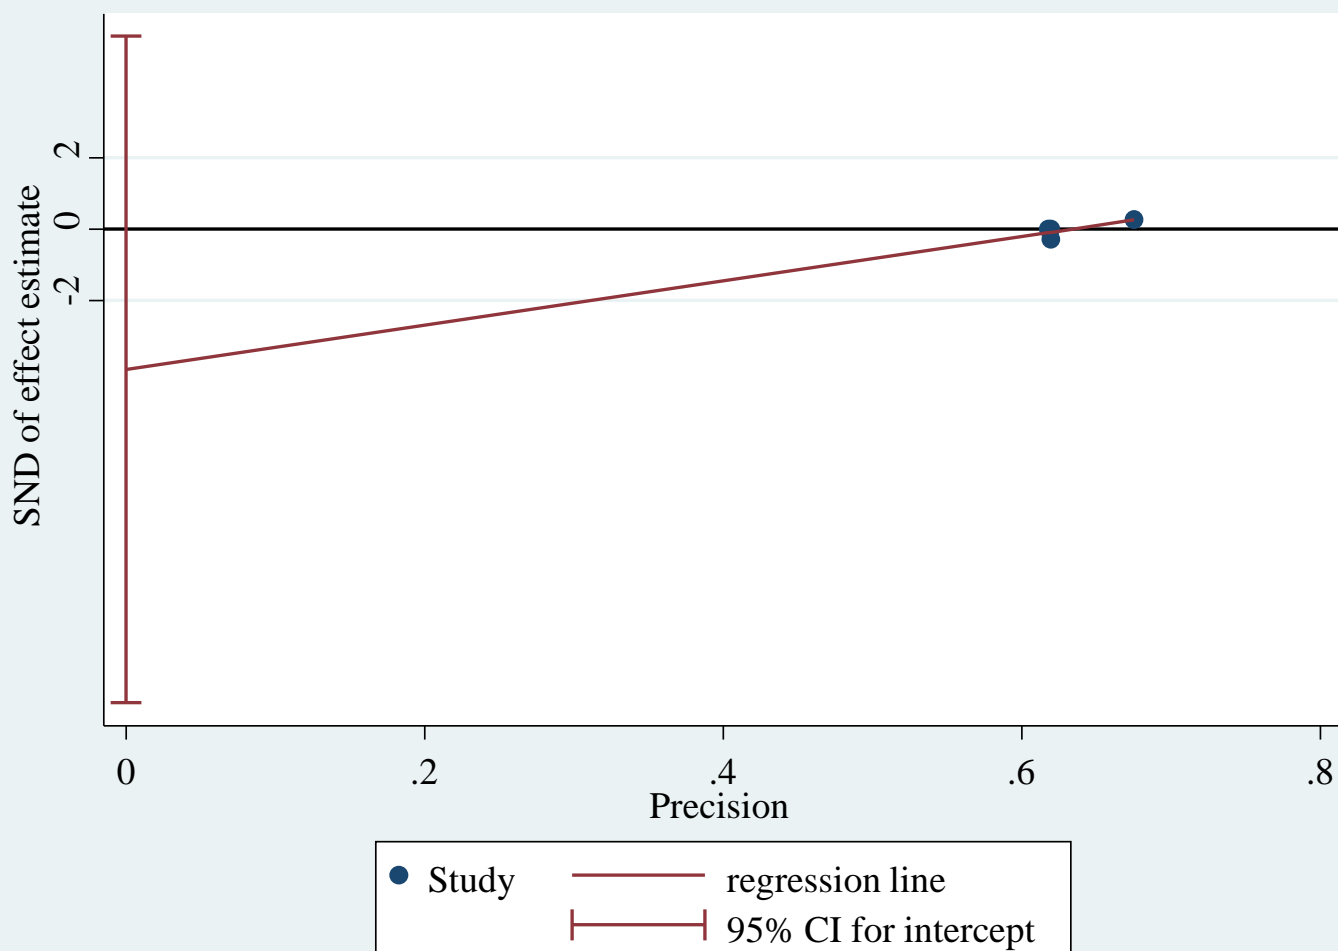

. metabias \_ES\_CEN seES , egger graph

Number of studies = 4

Root MSE = .168

| Std_Eff | Coef.     | Std. Err. | t     | P> t  | [95% Conf. Interval] |          |
|---------|-----------|-----------|-------|-------|----------------------|----------|
| slope   | 6.223821  | 3.426827  | 1.82  | 0.211 | -8.520627            | 20.96827 |
| bias    | -3.946957 | 2.171562  | -1.82 | 0.211 | -13.29044            | 5.396521 |

Test of H0: no small-study effects

P = 0.486

**Appendix 16 to 18**  
**Outcomes of Wound Event**

# Appendix 16

## Cumulative rank probability and SUCRA of wound event

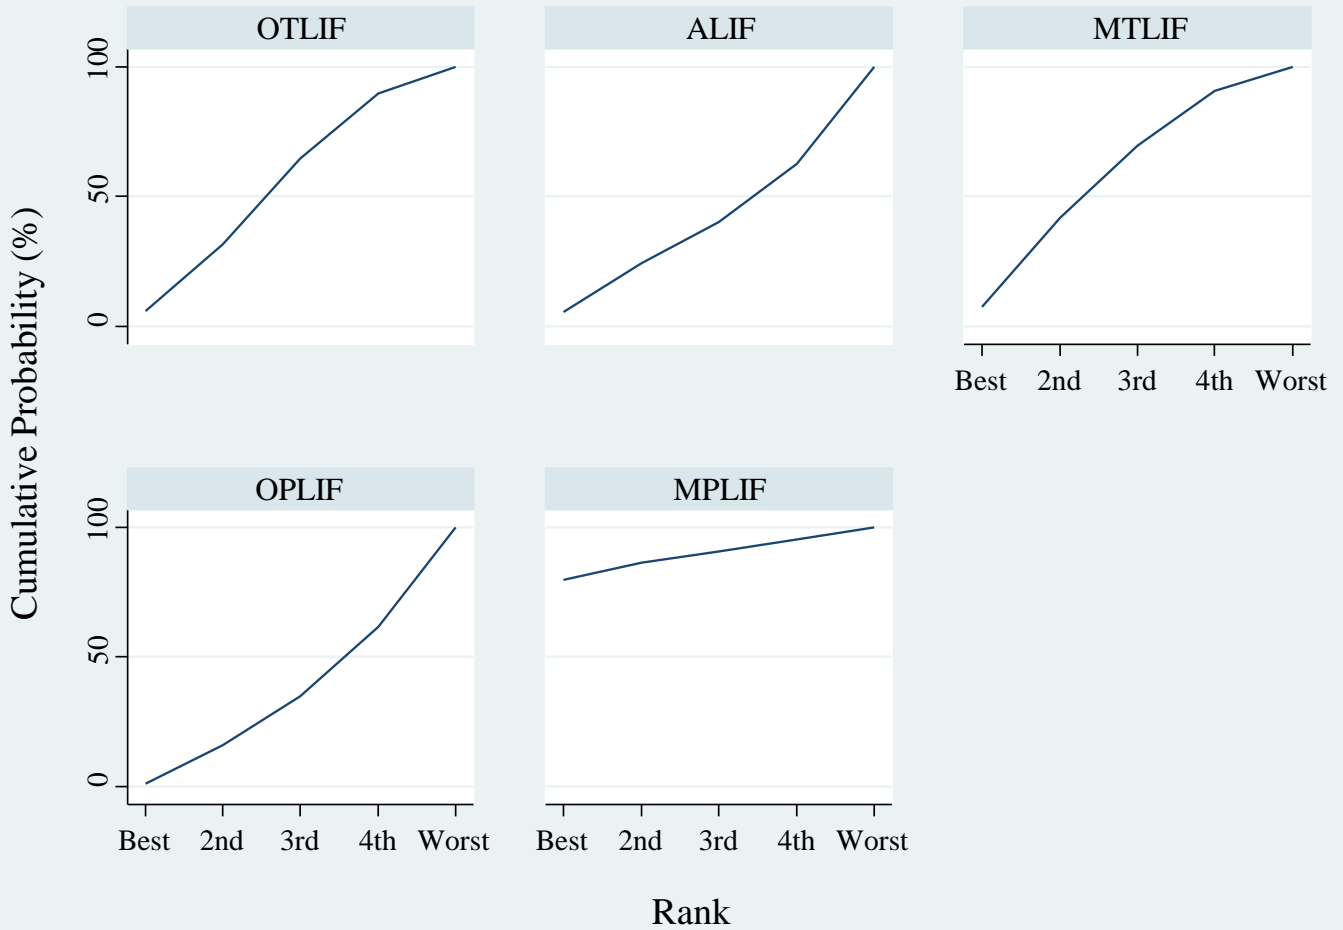

. sucra prob\*, labels(“OTLIF” “ALIF” “MTLIF” “OPLIF” “MPLIF”)

| Treatment | SUCRA | PrBest | MeanRank |
|-----------|-------|--------|----------|
| OTLIF     | 48.0  | 5.9    | 3.1      |
| ALIF      | 33.2  | 5.6    | 3.7      |
| MTLIF     | 52.4  | 7.5    | 2.9      |
| OPLIF     | 28.3  | 1.0    | 3.9      |
| MPLIF     | 88.1  | 79.9   | 1.5      |

# Appendix 17

## Inconsistency test of wound event

```
. network meta i, luades
Command is: mvmeta _y _S , bscovariance(exch 0.5) longparm suppress(uv mm)
eq(_y_D: groupB groupC) vars(_y_B _y_C _y_D _y_E)
```

Multivariate meta-analysis

Variance-covariance matrix = proportional .5\*I(4)+.5\*J(4,4,1)

Method = reml                                  Number of dimensions = 4

Restricted log likelihood = -30.48328        Number of observations = 9

|        | Coef.     | Std. Err. | z     | P> z  | [95% Conf. Interval] |          |
|--------|-----------|-----------|-------|-------|----------------------|----------|
| <hr/>  |           |           |       |       |                      |          |
| _y_B   |           |           |       |       |                      |          |
| _cons  | .1211219  | 1.000924  | 0.12  | 0.904 | -1.840654            | 2.082898 |
| <hr/>  |           |           |       |       |                      |          |
| _y_C   |           |           |       |       |                      |          |
| _cons  | -.1943727 | .9226487  | -0.21 | 0.833 | -2.002731            | 1.613986 |
| <hr/>  |           |           |       |       |                      |          |
| _y_D   |           |           |       |       |                      |          |
| groupB | -1.785665 | 2.808264  | -0.64 | 0.525 | -7.28976             | 3.718431 |
| groupC | -.9565285 | 2.150847  | -0.44 | 0.657 | -5.172112            | 3.259055 |
| _cons  | 1.169207  | 1.67905   | 0.70  | 0.486 | -2.121671            | 4.460084 |
| <hr/>  |           |           |       |       |                      |          |
| _y_E   |           |           |       |       |                      |          |
| _cons  | -1.149912 | 2.317178  | -0.50 | 0.620 | -5.691498            | 3.391674 |
| <hr/>  |           |           |       |       |                      |          |

Estimated between-studies SDs and correlation matrix:

|      | SD        | _y_B | _y_C | _y_D | _y_E |
|------|-----------|------|------|------|------|
| _y_B | .44713577 | 1    | .    | .    | .    |
| _y_C | .44713577 | .5   | 1    | .    | .    |
| _y_D | .44713577 | .5   | .5   | 1    | .    |
| _y_E | .44713577 | .5   | .5   | .5   | 1    |

Testing for inconsistency:

- (1) [\_y\_D]groupB = 0
- (2) [\_y\_D]groupC = 0

chi2( 2) = 0.43

Prob > chi2 = 0.8073

# Appendix 18

## Publication bias in network meta-analysis of wound event

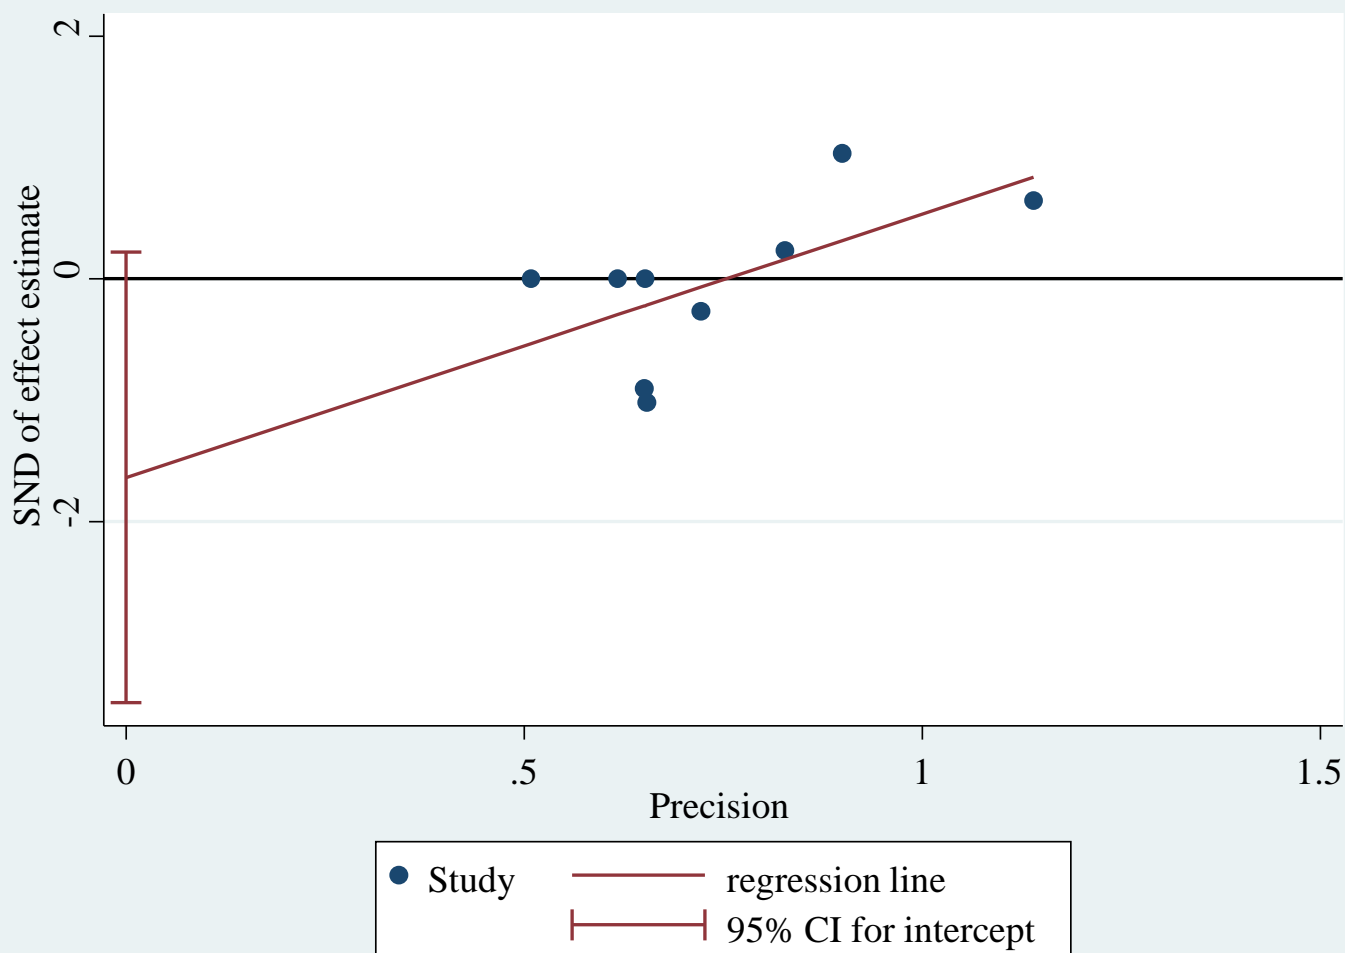

. metabias \_ES\_CEN seES , egger graph

Number of studies = 9

Root MSE = .55

| Std_Eff | Coef.    | Std. Err. | t     | P> t  | [95% Conf. Interval] |          |
|---------|----------|-----------|-------|-------|----------------------|----------|
| slope   | 2.165664 | 1.029146  | 2.10  | 0.073 | -0.2678802           | 4.599208 |
| bias    | -1.63626 | .7849823  | -2.08 | 0.076 | -3.492448            | .2199283 |

Test of H0: no small-study effects

P = 0.076
